# Supplementary material for: Predictive risk factors of complications in reduction mammoplasty—analysis of three different pedicles
Source: PubMed Central journal article supplement — Gland Surg. 2022 Aug;11(8):1309–22. doi: 10.21037/gs-22-116 (PMC9445710; doi:10.21037/gs-22-116), 2022-08
Supplement: gs-11-08-1309-dss.pdf [file gs-11-08-1309-dss.pdf]

## Data Sharing Statement

|                     |                                                                                                                                                     |                                                                                                                             |
|---------------------|-----------------------------------------------------------------------------------------------------------------------------------------------------|-----------------------------------------------------------------------------------------------------------------------------|
| <b>Article Info</b> | <a href="https://dx.doi.org/10.21037/gc-22-116">https://dx.doi.org/10.21037/gc-22-116</a>                                                           |                                                                                                                             |
| <b>Item</b>         | <b>Question</b>                                                                                                                                     | <b>Authors' Response<br/>(place "-" if not applicable)</b>                                                                  |
| 1                   | Would you like to share data collected for your study to others?                                                                                    | Yes.                                                                                                                        |
| 2                   | If not, would you like to share the reason for your decision?                                                                                       | -                                                                                                                           |
| 3                   | What data in particular will be shared?                                                                                                             | The datasets analyzed during the current study (no individual patient information).                                         |
| 4                   | Any other documents will be shared? Such as study protocol, statistical analysis plan, informed consent form, clinical study report, analytic code. | -                                                                                                                           |
| 5                   | When will data availability begin?                                                                                                                  | After the publication of the article.                                                                                       |
| 6                   | When will data availability end?                                                                                                                    | One year after the publication.                                                                                             |
| 7                   | To whom will you share the data?                                                                                                                    | To other researcher with the same study interest on reasonable request.                                                     |
| 8                   | For what type of analysis or purpose?                                                                                                               | To compare detailed results for manuscript.                                                                                 |
| 9                   | How or where can the data/documents be obtained?                                                                                                    | The datasets analyzed during the current study are available from the corresponding author on reasonable request via email. |
| 10                  | Any other restrictions?                                                                                                                             | -                                                                                                                           |
